# Supplementary material for: Wessex Head Injury Matrix in Patients with Prolonged Disorders of Consciousness: A Reliability Study
Source: MDPI journal article supplement (doi:10.3390/biomedicines12010082), 2023-12-28
Supplement: s1 [file s1]

# Wessex Head Injury Matrix in Patients with Prolonged Disorders of Consciousness: A Reliability Study

Maria Daniela Cortese <sup>1</sup>, Francesco Arcuri <sup>1</sup>, Martina Vatrano <sup>1</sup>, Giovanni Pioggia <sup>2</sup>, Antonio Cerasa <sup>1,2</sup>, Maria Girolama Raso <sup>1</sup>, Paolo Tonin <sup>1</sup> and Francesco Riganello <sup>1,\*</sup>

| Table S1s | test (32 UWS/VS; 19 MCS)   |                         |   |          |   |          |    | re-test (32 UWS/VS; 19MCS) |    |          |    |          |    |           |
|-----------|----------------------------|-------------------------|---|----------|---|----------|----|----------------------------|----|----------|----|----------|----|-----------|
|           |                            | CRS-R<br>total<br>score |   | WHIM TNB |   | WHIM MAB |    | CRS-R<br>total<br>score    |    | WHIM TNB |    | WHIM MAB |    |           |
|           | time from injury<br>(days) | A                       | B | A        | B | A        | B  | A                          | B  | A        | B  | A        | B  | aetiology |
| UWS/VS    | 185                        | 3                       | 3 | 2        | 2 | 7        | 7  | 5                          | 5  | 4        | 4  | 7        | 7  | HEM       |
| UWS/VS    | 219                        | 3                       | 3 | 1        | 1 | 7        | 7  | 5                          | 5  | 3        | 3  | 7        | 7  | HEM       |
| UWS/VS    | 340                        | 4                       | 4 | 3        | 3 | 7        | 7  | 7                          | 7  | 5        | 5  | 14       | 14 | HEM       |
| UWS/VS    | 538                        | 4                       | 4 | 5        | 5 | 14       | 14 | 5                          | 5  | 5        | 5  | 14       | 14 | HEM       |
| UWS/VS    | 200                        | 4                       | 4 | 2        | 3 | 17       | 17 | 9                          | 9  | 10       | 10 | 31       | 31 | HEM       |
| UWS/VS    | 280                        | 4                       | 4 | 4        | 4 | 24       | 24 | 10                         | 10 | 12       | 12 | 32       | 32 | HEM       |
| UWS/VS    | 195                        | 4                       | 4 | 3        | 4 | 7        | 7  | 5                          | 5  | 4        | 4  | 7        | 7  | ANOX      |
| UWS/VS    | 182                        | 4                       | 4 | 4        | 4 | 7        | 7  | 5                          | 5  | 4        | 4  | 13       | 13 | ANOX      |
| UWS/VS    | 213                        | 4                       | 4 | 2        | 1 | 4        | 3  | 5                          | 5  | 3        | 3  | 7        | 7  | ANOX      |
| UWS/VS    | 214                        | 4                       | 4 | 4        | 4 | 7        | 7  | 5                          | 5  | 5        | 5  | 12       | 12 | ANOX      |
| UWS/VS    | 299                        | 4                       | 4 | 4        | 4 | 7        | 7  | 5                          | 5  | 5        | 6  | 12       | 12 | ANOX      |
| UWS/VS    | 290                        | 4                       | 4 | 4        | 4 | 7        | 7  | 4                          | 4  | 5        | 4  | 13       | 8  | TBI       |
| UWS/VS    | 194                        | 4                       | 4 | 3        | 3 | 7        | 7  | 3                          | 3  | 4        | 4  | 7        | 7  | OTHER     |
| UWS/VS    | 277                        | 4                       | 4 | 3        | 3 | 7        | 7  | 4                          | 5  | 3        | 3  | 7        | 7  | HEM       |
| UWS/VS    | 200                        | 5                       | 5 | 5        | 5 | 14       | 14 | 5                          | 5  | 5        | 5  | 14       | 14 | ANOX      |
| UWS/VS    | 192                        | 5                       | 5 | 6        | 7 | 14       | 14 | 6                          | 6  | 5        | 5  | 14       | 14 | HEM       |
| UWS/VS    | 280                        | 5                       | 5 | 3        | 3 | 7        | 7  | 7                          | 7  | 4        | 4  | 7        | 7  | TBI       |
| UWS/VS    | 968                        | 6                       | 6 | 5        | 5 | 12       | 12 | 5                          | 5  | 6        | 6  | 14       | 14 | HEM       |
| UWS/VS    | 309                        | 6                       | 6 | 5        | 5 | 8        | 8  | 6                          | 6  | 5        | 5  | 14       | 14 | HEM       |
| UWS/VS    | 1072                       | 6                       | 6 | 4        | 4 | 14       | 14 | 6                          | 6  | 4        | 4  | 14       | 14 | HEM       |
| UWS/VS    | 185                        | 6                       | 6 | 8        | 8 | 34       | 34 | 8                          | 8  | 7        | 7  | 33       | 33 | ANOX      |
| UWS/VS    | 213                        | 6                       | 6 | 6        | 6 | 23       | 23 | 8                          | 8  | 6        | 6  | 23       | 23 | ANOX      |
| UWS/VS    | 2320                       | 6                       | 6 | 3        | 3 | 7        | 7  | 8                          | 8  | 9        | 9  | 23       | 23 | ANOX      |
| UWS/VS    | 250                        | 6                       | 6 | 7        | 7 | 32       | 32 | 7                          | 7  | 10       | 10 | 32       | 32 | TBI       |
| UWS/VS    | 394                        | 6                       | 6 | 8        | 9 | 24       | 24 | 7                          | 7  | 5        | 5  | 16       | 16 | TBI       |
| UWS/VS    | 254                        | 7                       | 7 | 5        | 5 | 15       | 15 | 7                          | 7  | 5        | 5  | 15       | 15 | HEM       |
| UWS/VS    | 297                        | 7                       | 7 | 4        | 4 | 11       | 11 | 7                          | 7  | 5        | 5  | 11       | 11 | HEM**     |

|        |      |    |    |    |    |    |    |    |    |    |    |    |    |       |
|--------|------|----|----|----|----|----|----|----|----|----|----|----|----|-------|
| UWS/VS | 190  | 7  | 7  | 9  | 9  | 36 | 36 | 10 | 10 | 10 | 10 | 36 | 36 | TBI   |
| UWS/VS | 258  | 7  | 7  | 7  | 6  | 20 | 20 | 7  | 7  | 7  | 7  | 20 | 20 | TBI   |
| UWS/VS | 190  | 7  | 7  | 7  | 7  | 14 | 14 | 7  | 7  | 7  | 7  | 14 | 14 | ANOX  |
| UWS/VS | 189  | 8  | 8  | 16 | 10 | 23 | 23 | 11 | 11 | 17 | 17 | 36 | 36 | OTHER |
| UWS/VS | 253  | 8  | 8  | 11 | 11 | 24 | 24 | 7  | 7  | 15 | 15 | 24 | 24 | TBI   |
| MCS    | 182  | 9  | 9  | 12 | 13 | 22 | 22 | 10 | 10 | 13 | 13 | 22 | 22 | HEM   |
| MCS    | 182  | 9  | 9  | 13 | 13 | 22 | 22 | 9  | 9  | 14 | 14 | 22 | 22 | HEM** |
| MCS    | 240  | 9  | 9  | 10 | 10 | 21 | 21 | 11 | 11 | 12 | 12 | 22 | 22 | HEM   |
| MCS    | 295  | 9  | 9  | 10 | 10 | 28 | 28 | 9  | 9  | 11 | 11 | 22 | 22 | HEM** |
| MCS    | 317  | 9  | 9  | 15 | 15 | 24 | 24 | 10 | 10 | 15 | 15 | 24 | 24 | TBI   |
| MCS    | 394  | 9  | 9  | 17 | 17 | 30 | 30 | 10 | 10 | 17 | 17 | 30 | 30 | TBI   |
| MCS    | 1488 | 9  | 9  | 12 | 12 | 24 | 24 | 10 | 10 | 13 | 13 | 24 | 24 | TBI   |
| MCS    | 200  | 10 | 10 | 16 | 16 | 35 | 35 | 10 | 10 | 14 | 14 | 35 | 35 | HEM** |
| MCS    | 1040 | 10 | 10 | 9  | 9  | 22 | 22 | 9  | 9  | 9  | 9  | 22 | 22 | HEM   |
| MCS    | 2143 | 10 | 10 | 10 | 10 | 23 | 23 | 10 | 10 | 10 | 9  | 23 | 23 | HEM   |
| MCS    | 190  | 10 | 10 | 16 | 16 | 23 | 23 | 12 | 12 | 17 | 17 | 29 | 29 | TBI   |
| MCS    | 411  | 10 | 10 | 12 | 11 | 24 | 23 | 10 | 10 | 12 | 12 | 24 | 23 | TBI   |
| MCS    | 2568 | 10 | 10 | 15 | 15 | 22 | 22 | 10 | 10 | 14 | 14 | 22 | 22 | TBI** |
| MCS    | 194  | 10 | 10 | 13 | 13 | 28 | 28 | 11 | 11 | 15 | 15 | 28 | 28 | OTHER |
| MCS    | 1591 | 11 | 11 | 25 | 25 | 40 | 40 | 13 | 13 | 25 | 25 | 40 | 40 | HEM   |
| MCS    | 3012 | 12 | 12 | 19 | 19 | 38 | 38 | 12 | 12 | 18 | 18 | 36 | 36 | TBI** |
| MCS    | 3325 | 12 | 12 | 10 | 10 | 31 | 31 | 12 | 12 | 10 | 10 | 31 | 31 | TBI   |
| MCS    | 822  | 13 | 13 | 20 | 20 | 36 | 36 | 13 | 13 | 19 | 19 | 36 | 36 | HEM** |
| MCS    | 241  | 17 | 17 | 16 | 16 | 33 | 33 | 17 | 17 | 16 | 16 | 33 | 33 | HEM   |

**WHIM** : Wessex Head Injury Matrix; **MAB**: Most Advanced Behavior; **TNB**: Total Number of different Behaviors; **CRS-R**: Coma Recovery Scale-Revised. **UWS/VS**: vegetative state/unresponsive wakefulness syndrome; **MCS**: minimally conscious state; **HEM**: hemorrhagic; **TBI**: traumatic brain injury; **ANOX**: anoxic; **OTHER**: other aetiology; **A & B**: Raters.

**\*\*** both raters observe changes in the WHIM TNB but no in the CRS-R total score

Table S2: Coma Recovery Scale-R - IRR

|          | test (A & B) (n=51) |        |       |            |               |         |             | re-test (A & B) (n=51) |        |       |            |               |         |             |
|----------|---------------------|--------|-------|------------|---------------|---------|-------------|------------------------|--------|-------|------------|---------------|---------|-------------|
| patients | uditive             | visual | motor | oro-verbal | communication | arousal | total score | uditive                | visual | motor | oro-verbal | communication | arousal | total score |
| 1        | 0                   | 0      | 2     | 1          | 0             | 0       | 3           | 1                      | 0      | 1     | 1          | 0             | 2       | 5           |
| 2        | 1                   | 0      | 1     | 1          | 0             | 0       | 3           | 1                      | 0      | 2     | 1          | 0             | 1       | 5           |
| 3        | 0                   | 0      | 2     | 1          | 0             | 1       | 4           | 2                      | 0      | 2     | 1          | 0             | 2       | 7           |
| 4        | 1                   | 0      | 1     | 1          | 0             | 1       | 4           | 1                      | 0      | 1     | 1          | 0             | 2       | 5           |
| 5        | 1                   | 0      | 1     | 1          | 0             | 1       | 4           | 3                      | 2      | 1     | 1          | 0             | 2       | 9           |
| 6        | 1                   | 0      | 1     | 1          | 0             | 1       | 4           | 2                      | 3      | 2     | 1          | 0             | 2       | 10          |
| 7        | 1                   | 0      | 1     | 1          | 0             | 1       | 4           | 1                      | 0      | 1     | 1          | 0             | 2       | 5           |
| 8        | 1                   | 0      | 2     | 0          | 0             | 1       | 4           | 1                      | 0      | 2     | 1          | 0             | 1       | 5           |
| 9        | 1                   | 0      | 2     | 1          | 0             | 0       | 4           | 1                      | 0      | 2     | 1          | 0             | 1       | 5           |
| 10       | 1                   | 0      | 1     | 1          | 0             | 1       | 4           | 1                      | 1      | 1     | 1          | 0             | 1       | 5           |
| 11       | 1                   | 0      | 1     | 1          | 0             | 1       | 4           | 1                      | 1      | 1     | 1          | 0             | 1       | 5           |
| 12       | 1                   | 0      | 1     | 0          | 0             | 2       | 4           | 1                      | 0      | 1     | 0          | 0             | 2       | 4           |
| 13       | 1                   | 0      | 1     | 1          | 0             | 1       | 4           | 1                      | 0      | 1     | 1          | 0             | 0       | 3           |
| 14 A     | 1                   | 0      | 2     | 1          | 0             | 1       | 5           | 1                      | 0      | 1     | 1          | 0             | 1       | 4           |
| 14 B     | 1                   | 1      | 1     | 0          | 0             | 2       | 5           | 1                      | 1      | 1     | 0          | 0             | 2       | 5           |
| 15       | 1                   | 0      | 2     | 1          | 0             | 1       | 5           | 1                      | 0      | 2     | 1          | 0             | 1       | 5           |
| 16       | 1                   | 0      | 2     | 1          | 0             | 1       | 5           | 1                      | 0      | 2     | 1          | 0             | 2       | 6           |
| 17       | 1                   | 1      | 2     | 0          | 0             | 1       | 5           | 1                      | 1      | 2     | 1          | 0             | 2       | 7           |
| 18       | 1                   | 0      | 2     | 1          | 0             | 2       | 6           | 1                      | 0      | 2     | 1          | 0             | 1       | 5           |
| 19       | 1                   | 0      | 2     | 1          | 0             | 2       | 6           | 1                      | 0      | 2     | 1          | 0             | 2       | 6           |
| 20       | 1                   | 0      | 2     | 1          | 0             | 2       | 6           | 1                      | 0      | 2     | 1          | 0             | 2       | 6           |
| 21       | 2                   | 1      | 1     | 1          | 0             | 1       | 6           | 2                      | 1      | 1     | 2          | 0             | 2       | 8           |
| 22       | 1                   | 1      | 2     | 1          | 0             | 1       | 6           | 2                      | 1      | 2     | 1          | 0             | 2       | 8           |
| 23       | 1                   | 1      | 2     | 1          | 0             | 1       | 6           | 2                      | 1      | 2     | 1          | 0             | 2       | 8           |
| 24       | 1                   | 0      | 2     | 1          | 0             | 2       | 6           | 2                      | 0      | 2     | 2          | 0             | 1       | 7           |
| 25       | 1                   | 0      | 1     | 2          | 0             | 2       | 6           | 2                      | 1      | 1     | 1          | 0             | 2       | 7           |
| 26       | 2                   | 1      | 1     | 1          | 0             | 2       | 7           | 2                      | 1      | 1     | 1          | 0             | 2       | 7           |
| 27       | 2                   | 1      | 2     | 1          | 0             | 1       | 7           | 2                      | 1      | 2     | 1          | 0             | 1       | 7           |
| 28       | 2                   | 0      | 2     | 1          | 0             | 2       | 7           | 3                      | 1      | 2     | 2          | 0             | 2       | 10          |
| 29       | 2                   | 1      | 1     | 1          | 0             | 2       | 7           | 2                      | 1      | 1     | 1          | 0             | 2       | 7           |
| 30       | 2                   | 0      | 2     | 1          | 0             | 2       | 7           | 2                      | 0      | 2     | 1          | 0             | 2       | 7           |
| 31       | 1                   | 1      | 2     | 2          | 0             | 2       | 8           | 3                      | 3      | 1     | 2          | 0             | 2       | 11          |
| 32       | 2                   | 1      | 2     | 1          | 0             | 2       | 8           | 2                      | 1      | 2     | 1          | 0             | 1       | 7           |
| 33       | 2                   | 3      | 2     | 1          | 0             | 1       | 9           | 2                      | 3      | 2     | 1          | 0             | 2       | 10          |
| 34       | 2                   | 1      | 2     | 2          | 0             | 2       | 9           | 2                      | 1      | 2     | 2          | 0             | 2       | 9           |

|    |                |   |   |   |   |   |    |   |   |   |   |   |   |    |
|----|----------------|---|---|---|---|---|----|---|---|---|---|---|---|----|
| 35 | 2              | 3 | 2 | 1 | 0 | 1 | 9  | 2 | 3 | 4 | 1 | 0 | 1 | 11 |
| 36 | 2              | 2 | 2 | 1 | 0 | 2 | 9  | 2 | 3 | 1 | 1 | 0 | 2 | 9  |
| 37 | 2              | 2 | 2 | 1 | 0 | 2 | 9  | 2 | 3 | 2 | 1 | 0 | 2 | 10 |
| 38 | 2              | 3 | 1 | 1 | 0 | 2 | 9  | 2 | 3 | 1 | 2 | 0 | 2 | 10 |
| 39 | 2              | 3 | 1 | 1 | 0 | 2 | 9  | 2 | 3 | 2 | 1 | 0 | 2 | 10 |
| 40 | 2              | 3 | 2 | 1 | 0 | 2 | 10 | 2 | 3 | 2 | 1 | 0 | 2 | 10 |
| 41 | 4              | 0 | 3 | 1 | 0 | 2 | 10 | 3 | 0 | 3 | 1 | 0 | 2 | 9  |
| 42 | 2              | 3 | 2 | 1 | 0 | 2 | 10 | 2 | 3 | 2 | 1 | 0 | 2 | 10 |
| 43 | 2              | 3 | 2 | 1 | 0 | 2 | 10 | 3 | 3 | 2 | 2 | 0 | 2 | 12 |
| 44 | 2              | 3 | 2 | 1 | 0 | 2 | 10 | 2 | 3 | 2 | 1 | 0 | 2 | 10 |
| 45 | 2              | 3 | 2 | 1 | 0 | 2 | 10 | 2 | 3 | 2 | 1 | 0 | 2 | 10 |
| 46 | 3              | 3 | 1 | 1 | 0 | 2 | 10 | 3 | 3 | 2 | 1 | 0 | 2 | 11 |
| 47 | 2              | 3 | 3 | 2 | 0 | 1 | 11 | 2 | 3 | 4 | 2 | 0 | 2 | 13 |
| 48 | 0              | 3 | 5 | 2 | 0 | 2 | 12 | 0 | 3 | 5 | 2 | 0 | 2 | 12 |
| 49 | 2              | 2 | 5 | 1 | 0 | 2 | 12 | 2 | 2 | 5 | 1 | 0 | 2 | 12 |
| 50 | 2              | 3 | 4 | 2 | 0 | 2 | 13 | 2 | 3 | 4 | 2 | 0 | 2 | 13 |
| 51 | 4              | 5 | 5 | 1 | 0 | 2 | 17 | 4 | 5 | 5 | 1 | 0 | 2 | 17 |
|    | A & B: Raters. |   |   |   |   |   |    |   |   |   |   |   |   |    |

| The Wessex Head Injury Matrix |                                                          |       |       |       |       |       |       |       |       |       |       |       |       |       |                         |       |                                                                                                                                                                                                                                                                                                 |
|-------------------------------|----------------------------------------------------------|-------|-------|-------|-------|-------|-------|-------|-------|-------|-------|-------|-------|-------|-------------------------|-------|-------------------------------------------------------------------------------------------------------------------------------------------------------------------------------------------------------------------------------------------------------------------------------------------------|
| Assessment number →           |                                                          | 1     | 2     | 3     | 4     | 5     | 6     | 7     | 8     | 9     | 10    | 11    | 12    | 13    | 14                      | 15    |                                                                                                                                                                                                                                                                                                 |
| Behaviour observed            |                                                          |       |       |       |       |       |       |       |       |       |       |       |       |       | Operational definitions |       |                                                                                                                                                                                                                                                                                                 |
| 1                             | Eyes open briefly                                        | 00000 | 00000 | 00000 | 00000 | 00000 | 00000 | 00000 | 00000 | 00000 | 00000 | 00000 | 00000 | 00000 | 00000                   | 00000 | Less than 30 seconds.                                                                                                                                                                                                                                                                           |
| 2                             | Eyes open for extended period                            | 00000 | 00000 | 00000 | 00000 | 00000 | 00000 | 00000 | 00000 | 00000 | 00000 | 00000 | 00000 | 00000 | 00000                   | 00000 | More than 30 seconds                                                                                                                                                                                                                                                                            |
| 3                             | Eyes open/move but do not focus on object/person         | 00000 | 00000 | 00000 | 00000 | 00000 | 00000 | 00000 | 00000 | 00000 | 00000 | 00000 | 00000 | 00000 | 00000                   | 00000 | Eyes move in random manner.<br>No sign of tracking and eyes do not rest on object or person.                                                                                                                                                                                                    |
| 4                             | Attention held momentarily by dominant stimulus          | 00000 | 00000 | 00000 | 00000 | 00000 | 00000 | 00000 | 00000 | 00000 | 00000 | 00000 | 00000 | 00000 | 00000                   | 00000 | Momentarily = 2 seconds or longer. Dominant stimulus = noisy/ large/brightly-coloured/painful. Identifiable change in behaviour however momentary e.g. from agitated to quiet, eyes closed to open, not moving to moving etc.                                                                   |
| 5                             | Looks at person briefly                                  | 00000 | 00000 | 00000 | 00000 | 00000 | 00000 | 00000 | 00000 | 00000 | 00000 | 00000 | 00000 | 00000 | 00000                   | 00000 | Looks at = eyes move around room aimlessly ... when object/person is noticed eyes remain on this.<br>Briefly = momentarily – impression of 'looking at'.                                                                                                                                        |
| 6                             | Volitional vocalisation, to express feelings             | 00000 | 00000 | 00000 | 00000 | 00000 | 00000 | 00000 | 00000 | 00000 | 00000 | 00000 | 00000 | 00000 | 00000                   | 00000 | Moans or groans as if to express discomfort, either spontaneously or when having procedures carried out e.g. passive movements to contracted limbs /injections /blood taken.                                                                                                                    |
| 7                             | Grinding of teeth/clamping down of teeth                 | 00000 | 00000 | 00000 | 00000 | 00000 | 00000 | 00000 | 00000 | 00000 | 00000 | 00000 | 00000 | 00000 | 00000                   | 00000 | Teeth grinding spontaneously or when swab placed in mouth.<br>Teeth clamp down in response to a foam mouth swab when placed in mouth.                                                                                                                                                           |
| 8                             | Makes eye contact                                        | 00000 | 00000 | 00000 | 00000 | 00000 | 00000 | 00000 | 00000 | 00000 | 00000 | 00000 | 00000 | 00000 | 00000                   | 00000 | Stand where patient is not directly looking at you and call patient's name. Patient switches gaze to you and maintains eye contact for at least 3 seconds.                                                                                                                                      |
| 9                             | Patient looks at person who is talking to them           | 00000 | 00000 | 00000 | 00000 | 00000 | 00000 | 00000 | 00000 | 00000 | 00000 | 00000 | 00000 | 00000 | 00000                   | 00000 | Switches gaze from somewhere else to look at person talking directly to patient. Continues to look for at least 3 seconds.                                                                                                                                                                      |
| 10                            | Expletive utterance ('Get off!', etc.)                   | 00000 | 00000 | 00000 | 00000 | 00000 | 00000 | 00000 | 00000 | 00000 | 00000 | 00000 | 00000 | 00000 | 00000                   | 00000 | ('Get off!', etc.).                                                                                                                                                                                                                                                                             |
| 11                            | Marked arousal & agitation prior to urination/defecation | 00000 | 00000 | 00000 | 00000 | 00000 | 00000 | 00000 | 00000 | 00000 | 00000 | 00000 | 00000 | 00000 | 00000                   | 00000 | Patient becomes increasingly restless and agitated immediately prior to urination/defecation. Patient calms down immediately afterwards.                                                                                                                                                        |
| 12                            | Eyes follow person moving in line of vision              | 00000 | 00000 | 00000 | 00000 | 00000 | 00000 | 00000 | 00000 | 00000 | 00000 | 00000 | 00000 | 00000 | 00000                   | 00000 | Patient's eyes move in direction of person moving in from midline to right or from midline to left. Patient need not track through whole visual field.                                                                                                                                          |
| 13                            | Looks at person giving attention                         | 00000 | 00000 | 00000 | 00000 | 00000 | 00000 | 00000 | 00000 | 00000 | 00000 | 00000 | 00000 | 00000 | 00000                   | 00000 | Eyes rest for at least 3 seconds on person who is giving attention, such as adjusting bed clothes or moving limbs.                                                                                                                                                                              |
| 14                            | Mechanical vocalisation (with yawn, sigh, etc.)          | 00000 | 00000 | 00000 | 00000 | 00000 | 00000 | 00000 | 00000 | 00000 | 00000 | 00000 | 00000 | 00000 | 00000                   | 00000 | Sound must be produced... silent yawns are not counted. (Able to produce normal sound when coughing.)                                                                                                                                                                                           |
| 15                            | Performs physical movement on verbal request             | 00000 | 00000 | 00000 | 00000 | 00000 | 00000 | 00000 | 00000 | 00000 | 00000 | 00000 | 00000 | 00000 | 00000                   | 00000 | I.e. obeys a command to verbal request single element. (e.g. raise arm).                                                                                                                                                                                                                        |
| 16                            | Turns head/eyes to look when someone is talking          | 00000 | 00000 | 00000 | 00000 | 00000 | 00000 | 00000 | 00000 | 00000 | 00000 | 00000 | 00000 | 00000 | 00000                   | 00000 | Eyes initially directed elsewhere. Moves eyes or turns head to look at person talking. Person is not necessarily talking to the patient.                                                                                                                                                        |
| 17                            | Watches person moving in line of vision                  | 00000 | 00000 | 00000 | 00000 | 00000 | 00000 | 00000 | 00000 | 00000 | 00000 | 00000 | 00000 | 00000 | 00000                   | 00000 | Person moves from one side of bed around bottom of bed and to other side. Patient's eyes follow from end of bed to right or left or both.                                                                                                                                                       |
| 18                            | Tracks for 3-5 seconds                                   | 00000 | 00000 | 00000 | 00000 | 00000 | 00000 | 00000 | 00000 | 00000 | 00000 | 00000 | 00000 | 00000 | 00000                   | 00000 | Attract patient's attention with large brightly coloured object and move through visual field. Record if patient tracks through at least 90°.                                                                                                                                                   |
| 19                            | Speaks in whispered tones                                | 00000 | 00000 | 00000 | 00000 | 00000 | 00000 | 00000 | 00000 | 00000 | 00000 | 00000 | 00000 | 00000 | 00000                   | 00000 | Patient vocalises in whispered tones.                                                                                                                                                                                                                                                           |
| 20                            | Vocalises to express mood or needs                       | 00000 | 00000 | 00000 | 00000 | 00000 | 00000 | 00000 | 00000 | 00000 | 00000 | 00000 | 00000 | 00000 | 00000                   | 00000 | Vocalises as if to express mood or need either spontaneously or when having unpleasant procedures e.g. blood taken, injection, chest physio etc.                                                                                                                                                |
| 21                            | Crying                                                   | 00000 | 00000 | 00000 | 00000 | 00000 | 00000 | 00000 | 00000 | 00000 | 00000 | 00000 | 00000 | 00000 | 00000                   | 00000 | Patient cries, tears may or may not be present.                                                                                                                                                                                                                                                 |
| 22                            | Tracks a source of sound                                 | 00000 | 00000 | 00000 | 00000 | 00000 | 00000 | 00000 | 00000 | 00000 | 00000 | 00000 | 00000 | 00000 | 00000                   | 00000 | Bell, whistle, buzzer or similar.<br>Patient turns head or eyes towards source of sound.                                                                                                                                                                                                        |
| 23                            | Shows selective response to preferred people             | 00000 | 00000 | 00000 | 00000 | 00000 | 00000 | 00000 | 00000 | 00000 | 00000 | 00000 | 00000 | 00000 | 00000                   | 00000 | To family when tester is present ... obeys commands for relative, cooperates with relative but not with staff, becomes quiet/more relaxed when relative is present or becomes noisier when relative is present. Appears more 'relaxed' or 'cooperative' with some members of staff than others. |

Page 2

Figure S1: image of the first page of the WHIM (English version). The WHIM scale does not exist in the free version. The French free version is available at <https://www.uslegalforms.com/form-library/103332-wessex-head-injury-matrix-pdf>.
